# Supplementary material
Source: PubMed Central journal article supplement (PMC5446539)
Supplement: ajtr0009-2595-f8.pdf [file ajtr0009-2595-f8.pdf]

# Arthritis treatment by hASCs in mice

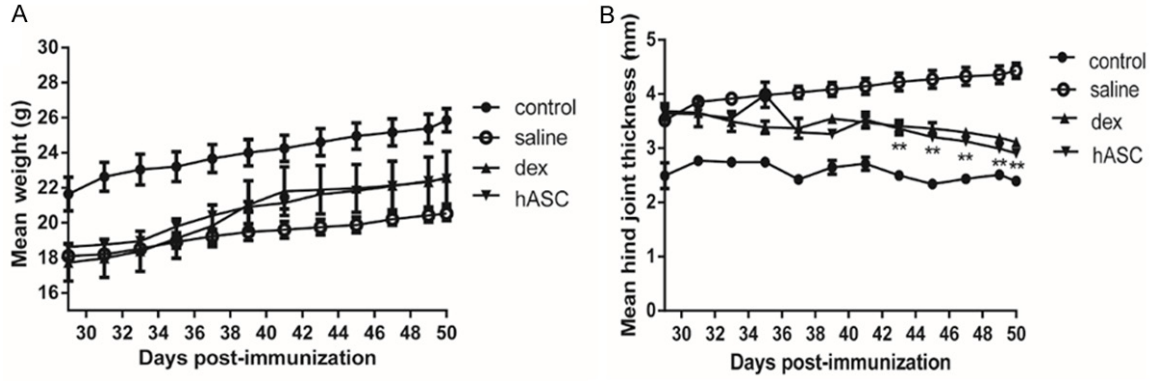

**Supplementary Figure 1.** A: Mean weights of the mice in each group.  $**P < 0.01$ . All the data are expressed as the means  $\pm$  SD. B: Joint thickness of the mice in each group assessed with caliper measurements.  $**P < 0.01$ . All the data are expressed as the means  $\pm$  SD.
